# Supplementary material for: Integrating dye-intercalated DNA dendrimers with electrospun nanofibers: a new fluorescent sensing platform for nucleic acids, proteins, and cells
Source: Royal Society of Chemistry journal article supplement (doi:10.1039/c5tb00357a), 2015-01-01
Supplement: c5tb00357a1.pdf [file c5tb00357a1.pdf]

## Electronic Supplementary Information

### **Integrating dye-intercalated DNA dendrimers with electrospun nanofibers: a new fluorescent sensing platform for nucleic acids, proteins, and cells**

Huaming Wang,<sup>a</sup> Wei Tang,<sup>a</sup> Hejia Wei,<sup>b,c</sup> Yan Zhao,<sup>a</sup> Shichao Hu,<sup>a</sup> Yan Guan,<sup>a</sup> Wei Pan,<sup>a</sup> Bin Xia,<sup>a,b,c</sup> Na Li<sup>a</sup> and Feng Liu<sup>a,\*</sup>

<sup>a</sup>Beijing National Laboratory for Molecular Science, Key Laboratory of Bioorganic Chemistry and Molecular Engineering of Ministry of Education, College of Chemistry and Molecular Engineering, Peking University, Beijing 100871, China

<sup>b</sup>Beijing NMR Center, Peking University, Beijing 100871, China

<sup>c</sup>College of Life Sciences, Peking University, Beijing 100871, China

\*Corresponding author. E-mail: liufeng@pku.edu.cn

### **Materials and reagents**

Poly(styrene-co-maleic acid) (PSMA) ( $M_w=65000$ ) was purchased from Sigma-Aldrich (St. Louis, MO, USA). N, N-dimethylformamide (DMF) was purchased from Beijing Chemical Work, (Beijing, China). N-(3-dimethyl-aminopropyl)-N'-ethylcarbodiimide hydrochloride (EDC) was obtained from J&K Scientific (Beijing, China). N-hydroxysuccinimide (NHS) was ordered from Sinopharm Chemical Reagent Co. Ltd. (Shanghai, China). HPLC-purified DNA oligonucleotides were ordered from Sangon Inc. (Shanghai, China), and their sequences were listed in Table S1–S3. Thrombin (Thb) was obtained from Enzyme Research (South Bend, IN, USA). Other interfering proteins including human serum albumin (HSA), lysozyme (Lzm), hemoglobin (Hb), and fibrinogen (Fib) were ordered from Sigma-Aldrich (St. Louis, MO, USA). Fetal bovine serum (FBS) was purchased from Solarbio (Beijing, China). Phosphate buffer saline (PBS) (150 mM NaCl, 10 mM NaH<sub>2</sub>PO<sub>4</sub>, 1 mM EDTA, pH=7.4) was used as the buffer solution. All other reagents were of analytical grade, and deionized water was used in all experiments.

## **Characterization**

The PSMA electrospun nanofibers were fabricated using a set of homemade electrospinning setup, which contained a high voltage supply (Beigao, Beijing, China), a syringe pump (Lion, Zhejiang, China) and a grounded rotary collector.<sup>1</sup> The average diameter of the G<sub>3</sub> DNA dendrimer was measured using an ALV/DLS/SLS-5022F laser light scattering spectrometer (ALV/Laser Vertriebsgesellschaft m. b. H, German). The morphologies of the G<sub>3</sub> and NF-capture/target/reporter-G<sub>3</sub>SG sandwich-type nanocomplex were characterized using an S-4800 scanning electron microscope (Hitachi, Japan) and an SPA400 atomic force microscopy (Seiko Instruments, Japan). The fluorescent images were observed by an A1Rsi laser scanning confocal microscopy (Nikon, Japan). Fluorescence spectra were determined using an F-4500 fluorescence spectrophotometer (Hitachi, Tokyo, Japan). UV-vis absorption spectra were recorded on a U-3010 spectrophotometer (Hitachi, Tokyo, Japan). Fluorescence lifetime was measured using an FLS920 steady state and lifetime fluorescence spectrometer (Edinburgh instrument, UK).

## **Agarose gel electrophoresis experiments**

The 1.5 % agarose gels containing 0.05  $\mu\text{L}$  SYBG I dye per milliliter of gel volume were prepared by using 1 $\times$ TAE buffer. 5  $\mu\text{L}$  DNA sample was mixed with 1  $\mu\text{L}$  6 $\times$ glycerol loading buffer (Sangon, Shanghai, China) and loaded into the gel. The gel electrophoresis was conducted at a constant voltage of 110 V for 1 h and scanned by a Tanon 1600 imager (Shanghai, China).

## **Fluorescence quantum yield measurement**

To measure the quantum yield ( $\Phi_F$  (G<sub>3</sub>SG)) of the G<sub>3</sub>SG, the solution of the G<sub>3</sub>SG was diluted to an absorbance of 0.05. The absorbance of G<sub>3</sub>SG solution at 488 nm and the integrate areas of the fluorescence-corrected spectra of G<sub>3</sub>SG were recorded. The relative fluorescence quantum yield of the G<sub>3</sub>SG was obtained using fluorescein in 0.1 M NaOH ( $\Phi_F$  (fluorescein) = 0.92) as the standard.

## **Quantification of capture probe densities on the sensing membranes**

The NF-capture membrane of 1.4 $\times$ 2.5 cm<sup>2</sup> was first incubated with 400  $\mu\text{L}$ , 2  $\mu\text{M}$  solution of FAM-labeled complementary DNA (ACTTCATCCACGT-FAM) overnight to allow fully hybridization. After washing off the non-specific adsorption

with PBS buffer, the membrane was incubated with 100  $\mu\text{L}$  EtOH to dehybridize the FAM-labeled DNA. The total supernatant containing the FAM-labeled DNA was diluted to 2 mL with PBS and its fluorescence intensity was recorded. A standard curve of the FAM-labeled DNA from 0.5 to 50 nM was also prepared using the same PBS buffer. The capture probe density on the sensing membrane was calculated based on the amount of the FAM-labeled DNA and the surface area of the sensing membrane.

### **Spike recovery test**

In order to evaluate the feasibility of the proposed sensing platform in a real physiological media, the targets, 1 nM  $\beta$ -thalassemia gene fragment and thrombin, and 1000 cells/mL HeLa cells, were respectively added into the diluted fetal bovine serum (FBS). The fluorescence increment of the spiked and unspiked samples were recorded as  $\Delta F$  (target+FBS) and  $\Delta F$ (FBS). And the fluorescence signal of the spiked target in FBS was obtained as follow:

$$\Delta F(\text{target}) = \Delta F(\text{target} + \text{FBS}) - \Delta F(\text{FBS})$$

The detected target concentration in the spiked FBS ( $c(\text{detected})$ ) was calculated based on  $\Delta F(\text{target})$  and the corresponding linear regression equation. And the spike recovery was calculated based on  $c(\text{detected})$  and  $c(\text{added})$ :

$$\text{Recovery} = \frac{n(\text{detected})}{n(\text{added})} \times 100\% = \frac{c(\text{detected})}{c(\text{added})} \times 100\%$$

**Table S1.** DNA oligonucleotide sequences for the step-by-step assembly of the DNA dendrimer backbones.

| Name                         | Sequences (5' to 3') <sup>a</sup> |                             |
|------------------------------|-----------------------------------|-----------------------------|
|                              | Sticky ends                       | Common sequences            |
| <b>Y<sub>0a</sub>_strand</b> | TGTCATATTCGTA                     | GTTCTGTCTCGCTTAAGTTTAAACATG |
| <b>Y<sub>1a</sub>_strand</b> | CGCTTATCTGGGA                     |                             |
| <b>Y<sub>2a</sub>_strand</b> | ACCACTCCACCTC                     |                             |
| <b>Y<sub>3a</sub>_strand</b> | GTTCTGTGTAAAT                     |                             |
| <b>Y<sub>4a</sub>_strand</b> | TCACCTCTACTAC                     |                             |
| <b>Y<sub>0b</sub>_strand</b> | TGTCATATTCGTA                     | CATGTAAACTTACTATCTCTACTCT   |
| <b>Y<sub>1b</sub>_strand</b> | CGCTTATCTGGGA                     |                             |
| <b>Y<sub>2b</sub>_strand</b> | ACCACTCCACCTC                     |                             |
| <b>Y<sub>3b</sub>_strand</b> | GTTCTGTGTAAAT                     |                             |
| <b>Y<sub>4b</sub>_strand</b> | TCACCTCTACTAC                     |                             |
| <b>Y<sub>0c</sub>_strand</b> | TGTCATATTCGTA                     | AGAGTAGAGATAGAGCGAGACAGAAC  |
| <b>Y<sub>1c</sub>_strand</b> | TACGAATATGACA                     |                             |
| <b>Y<sub>2c</sub>_strand</b> | TCCCAGATAAGCG                     |                             |
| <b>Y<sub>3c</sub>_strand</b> | GAGGTGGAGTGGT                     |                             |
| <b>Y<sub>4c</sub>_strand</b> | ATTTACACAGAAC                     |                             |

<sup>a</sup>The sticky ends of each generation of DNA dendrimers are shown in color: G<sub>0</sub>: green, G<sub>1</sub>: yellow, G<sub>2</sub>: blue, G<sub>3</sub>: red, and G<sub>4</sub>: purple.

**Table S2.** The capture and reporter DNA sequences for the sensing of  $\beta$ -thalassemia gene fragment, thrombin, and HeLa cells.

| Target                                              | Probe                   | Sequences (5' to 3') <sup>a</sup>                                               |
|-----------------------------------------------------|-------------------------|---------------------------------------------------------------------------------|
| <b><math>\beta</math>-thalassemia gene fragment</b> | Capture                 | ACGTGGATGAAGTTTTTTT-NH <sub>2</sub>                                             |
|                                                     | Reporter                | <b>ATTACACAGAACAAGGGGCAAGGT</b>                                                 |
|                                                     | Target                  | ACTTCATCCACGTTACCTTGCCCCCTT                                                     |
|                                                     | 1-Mismatch              | ACTTCATCCACGTTACCT <u>AG</u> CCCCCTT                                            |
|                                                     | 2-Mismatch              | ACTTCATCCACGTTACCT <u>AC</u> CCCCCTT                                            |
|                                                     | 3-Mismatch              | ACTTCATCCACGTTACCT <u>ACG</u> CCCCCTT                                           |
|                                                     | Random                  | ACTGACTGACTGACTGACTGACTGACT                                                     |
| <b>Thrombin</b>                                     | Capture (TBA15)         | NH <sub>2</sub> -TTTTTTTTTTGGTTGGTGTGGTTGG                                      |
|                                                     | Reporter (TBA29)        | <b>ATTACACAGAACAGTCCGTGGTAGGGCAGG</b><br><b>TGGGGGTGACT</b>                     |
| <b>HeLa cells</b>                                   | Capture (Sgc8 aptamer)  | NH <sub>2</sub> -<br>TTTTTTATCTAACTGCTGCGCCGCCGGGAAAA<br><b>TACTGTACGGTTAGA</b> |
|                                                     | Reporter (Sgc8 aptamer) | <b>ATTACACAGAACATCTAACTGCTGCGCCGCC</b><br><b>GGGAAAATACTGTACGGTTAGA</b>         |

<sup>a</sup>The single-stranded domains to hybridize with the sticky ends of G<sub>3</sub> are marked in color. The functional domains to bind with the targets are marked in bold type. The mismatched bases in the mutant target sequences are underlined.

**Table S3.** Different reporter DNA sequences for evaluating the effect of fluorescent signal probes on the sensitivity of the sensing platforms.

| <b>Probe</b>                | <b>Sequences (5' to 3')<sup>a</sup></b> |
|-----------------------------|-----------------------------------------|
| <b>Reporter<sub>0</sub></b> | <b>TACGAATATGACAAAGGGGCAAGGT</b>        |
| <b>Reporter<sub>1</sub></b> | <b>TCCCAGATAAGCGAAGGGGCAAGGT</b>        |
| <b>Reporter<sub>2</sub></b> | <b>GAGGTGGAGTGTTAAGGGGCAAGGT</b>        |
| <b>Reporter<sub>3</sub></b> | <b>ATTTACACAGAACAAGGGGCAAGGT</b>        |
| <b>Reporter<sub>4</sub></b> | <b>GTAGTAGAGGTGAAAGGGGCAAGGT</b>        |
| <b>Reporter-FAM</b>         | <b>FAM-AAGGGGCAAGGT</b>                 |

<sup>a</sup>The single-stranded domains to hybridize with the sticky ends of the DNA dendrimers are marked in color. The functional domains to bind with the targets are marked in bold type.

**Table S4.** Comparison between the proposed fluorescent sensing platform with other non-enzymatic and enzymatic fluorescent approaches for nucleic acid detection.

| <b>Assay format</b>                                    | <b>Label</b>                    | <b>LOD</b> | <b>Reference</b> |
|--------------------------------------------------------|---------------------------------|------------|------------------|
| <b>Non-enzymatic approach</b>                          |                                 |            |                  |
| Sandwich hybridization assay on electrospun nanofibers | Dye-intercalated DNA dendrimer  | 20 pM      | This work        |
| ThT based molecular beacon                             | Thioflavin T                    | 6.5 nM     | 2                |
| Sandwich hybridization assay                           | Fluorescent magnetic liposomes  | 35 pM      | 3                |
| Photo induced electron transfer                        | DNA/Ag fluorescent nanoclusters | 0.6 nM     | 4                |
| Target-induced desorption                              | DNA-stabilized Ag nanoclusters  | 0.5 nM     | 5                |
| Molecular beacon                                       | ZnSe quantum dot                | 10 pM      | 6                |
| De novo fluorophore synthesis                          | Stilbene                        | 40 pM      | 7                |
| Bio-barcode assay                                      | AgNPs enhanced fluorescence     | 1 pM       | 8                |
| Fluorescence quenching by MoS <sub>2</sub> nanosheet   | FAM                             | 500 pM     | 9                |
| Graphene oxide quenched molecular beacon               | FAM and Cy5                     | 2 nM       | 10               |
| <b>Enzymatic approach</b>                              |                                 |            |                  |
| Autocatalytic DNAzyme-Mediated Process                 | FAM                             | 1 pM       | 11               |
| Exonuclease-assisted autocatalytic target recycling    | FAM, TAMRA, and Cy 5            | 20 pM      | 12               |
| Exonuclease III-aided target recycling                 | CAL Fluor Red 610               | 10 pM      | 13               |
| Zn <sup>2+</sup> -ligation DNAzyme driven cascades     | Cy3 and Cy5                     | 20 pM      | 14               |
| Endonuclease IV and lambda exonuclease coupling system | FAM                             | 20 pM      | 15               |
| DNA cross-triggered cascading circuit                  | SYBR Green I                    | 100 fM     | 16               |

**Table S5.** The LODs of different methods for  $\beta$ -thalassemia gene fragment, thrombin, and HeLa cells detection.

| Assay format                                                                   | Detection technique         | Use of enzyme | LOD           | Reference |
|--------------------------------------------------------------------------------|-----------------------------|---------------|---------------|-----------|
| <b><math>\beta</math>-thalassemia gene fragment detection</b>                  |                             |               |               |           |
| Multiplexed bead-based mesofluidic system                                      | Fluorescence                | No            | 10 pM         | 17        |
| DNA ligase reaction and biocatalyzed deposition                                | Quartz crystal microbalance | Yes           | 0.1 nM        | 18        |
| DNA ligase-mediated AuNP assembly                                              | Colorimetric                | Yes           | 121 pM        | 19        |
| Rolling circle amplification and AuNP aggregates                               | Colorimetric                | Yes           | 70 fM         | 20        |
| Polymerization-induced enzymatic amplification                                 | Electrochemical             | Yes           | 0.01 pM       | 21        |
| Integration of DNA dendrimers with electrospun nanofibers                      | Fluorescence                | No            | 20 pM         | This work |
| <b>Thrombin detection</b>                                                      |                             |               |               |           |
| Aptamer-based label-free fluorescing molecular switch                          | Fluorescence                | No            | 2.8 nM        | 22        |
| Aptamer-based unmodified AuNP probes                                           | Colorimetric                | No            | 0.83 nM       | 23        |
| Nanocomposite of graphene and plasma polymerized allylamine                    | Quartz crystal microbalance | No            | 182 pM        | 24        |
| Iodide-induced ligand displacement                                             | Fluorescence                | No            | 89 pM         | 25        |
| Exonuclease-assisted amplification                                             | Electrochemical             | Yes           | 0.9 pM        | 26        |
| Aptamer-based rolling circle amplification and nanoparticle signal enhancement | Surface plasmon resonance   | Yes           | 0.78 aM       | 27        |
| Integration of DNA dendrimers with electrospun nanofibers                      | Fluorescence                | No            | 42 pM         | This work |
| <b>HeLa cells detection</b>                                                    |                             |               |               |           |
| IrO <sub>2</sub> -hemin-TiO <sub>2</sub> nanowire arrays                       | Photoelectrochemical        |               | 8000 cells/mL | 28        |
| Aggregation of primer-modified AuNPs                                           | Colorimetric                |               | 1000 cells/mL | 29        |
| Enzyme-linked immunoassay on PDCN <sub>x</sub> nanotubes                       | Electrochemical             |               | 500 cells/mL  | 30        |
| Carbon nanodot@Ag and graphene for dual signal amplification                   | Electrochemiluminescent     |               | 10 cells/mL   | 31        |
| Integration of DNA dendrimers with electrospun nanofibers                      | Fluorescence                |               | 1500 cells/mL | This work |



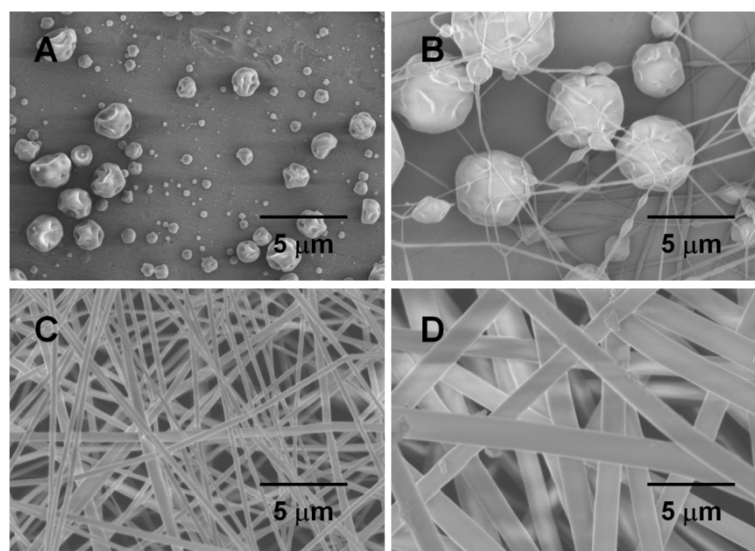

**Fig. S1** SEM images of the electrospun products obtained from PSMA-DMF solution of different weigh percentages (*w/w*). (A) 10%, (B) 20%, (C) 40%, and (D) 50%. The 40% PSMA-DMF was used as the electrospinning solution.

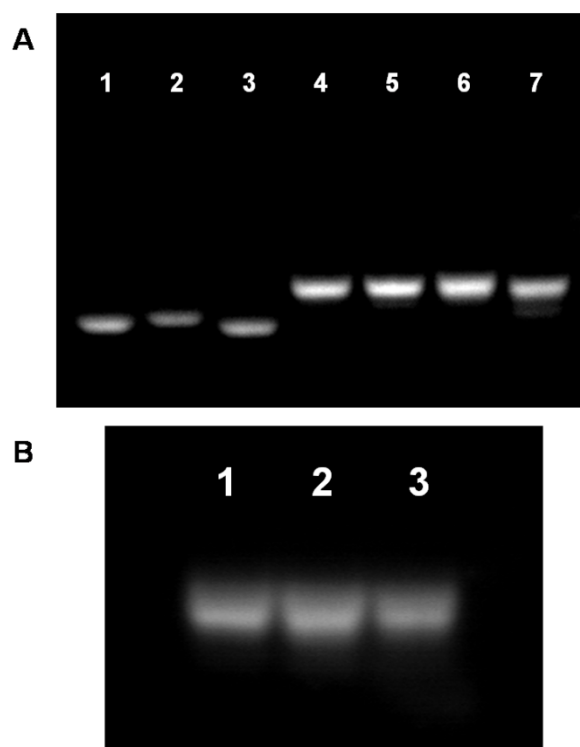

**Fig. S2** Agarose gel electrophoresis showing (A) the formation of Y-DNA from three single strands. Lane 1:  $Y_{0a}$ , lane 2:  $Y_{0b}$ , lane 3:  $Y_{0c}$ , lane 4:  $Y_0$ , lane 5:  $Y_1$ , lane 6:  $Y_2$ , and lane 7:  $Y_3$ . (B) Stability of the  $G_3$  DNA dendrimer. Lane 1: the as-prepared  $G_3$ , lane 2:  $G_3$  kept in 4 °C for 1 week, and lane 3:  $G_3$  kept in 4 °C for 3 weeks.

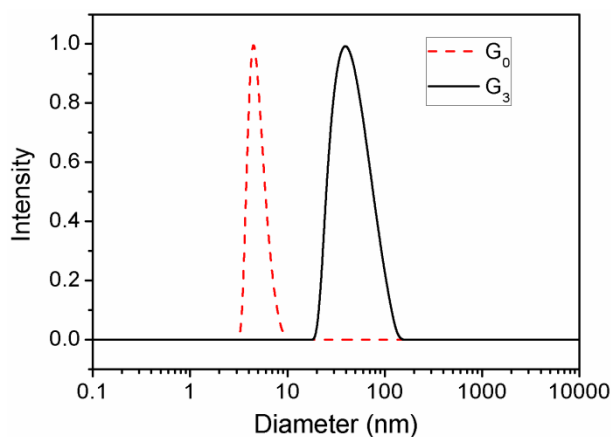

**Fig. S3** Dynamic light scattering data of the G<sub>0</sub> and G<sub>3</sub> DNA dendrimers. The average diameters of G<sub>0</sub> and G<sub>3</sub> are  $4.8 \pm 0.8$  nm and  $49 \pm 17$  nm, respectively, demonstrating the growing size of the DNA dendrimers.

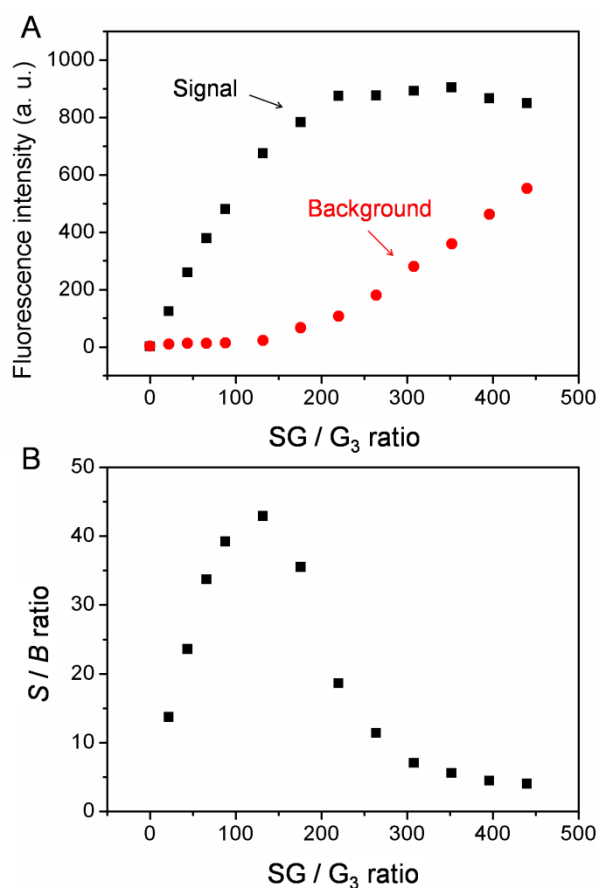

**Fig. S4** (A) Dependence of fluorescence intensities on the SG/G<sub>3</sub> ratio.  $F_{\text{signal}}$  is the fluorescence generated by the SG molecules intercalated in the G<sub>3</sub> DNA dendrimer, and  $F_{\text{background}}$  is the fluorescence generated by the excess SG. (B) Dependence of signal-to-background ratio ( $F_{\text{signal}}/F_{\text{background}}$ ) to the SG/G<sub>3</sub> ratio. The  $F_{\text{signal}}/F_{\text{background}}$  ratio reaches maximum at the SG/G<sub>3</sub> ratio of 132, corresponding to 132 SG dyemolecules intercalated into each G<sub>3</sub> DNA dendrimer.

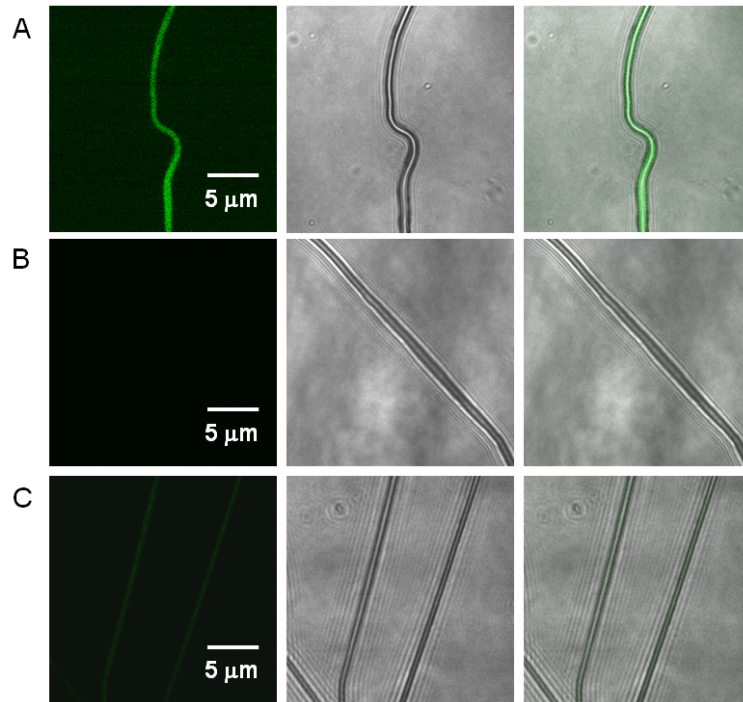

**Fig. S5** Confocal fluorescence microscopy images of (A) NFs-target- $G_3SG$  nanocomplex in the presence of 20 nM  $\beta$ -thalassemia gene fragment target, (B) blank NFs, and (C) NFs-target- $G_3SG$  in the absence of target.

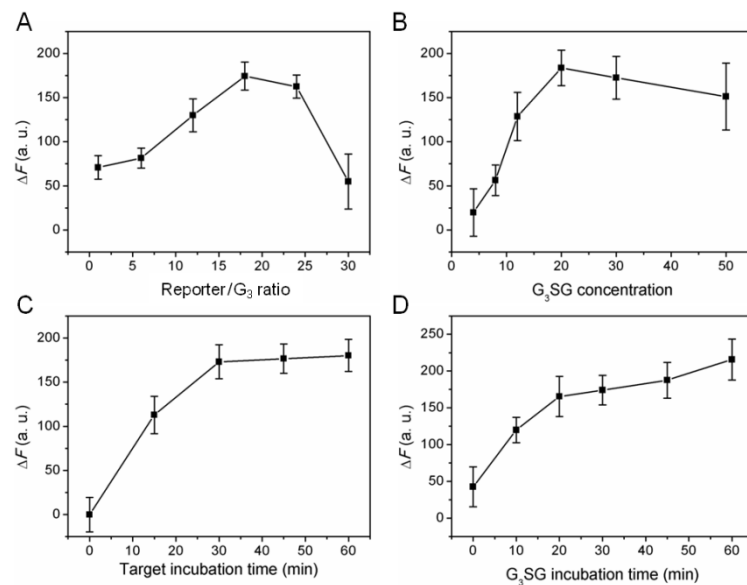

**Fig. S6** Fluorescence increment ( $\Delta F$ ) of the proposed sensors to 1 nM  $\beta$ -thalassemia gene fragment target at different (A) reporter/ $G_3$  ratio, (B)  $G_3SG$  concentration, (C) target incubation time, and (D)  $G_3SG$  incubation time. The optimized sensing conditions were chosen as follow: the number of reporter/ $G_3$  ratio was 16, the  $G_3SG$  concentration was 20 nM, the target incubation time was 30 min, and the  $G_3SG$  incubation time was 30 min.

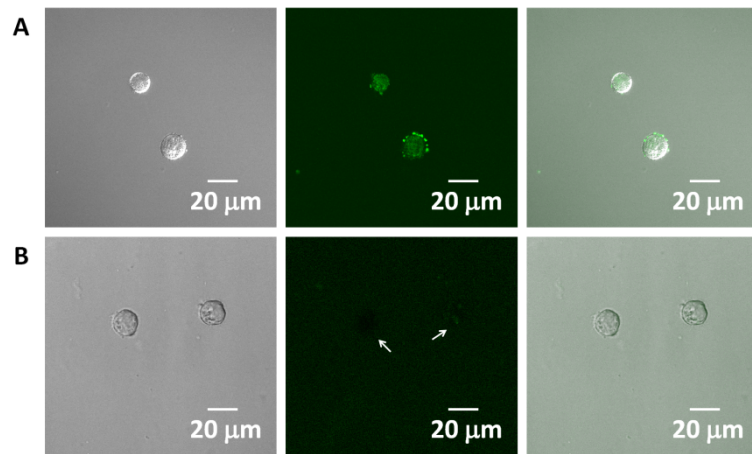

**Fig. S7** Confocal fluorescence microscopy images showing the HeLa cells (A) and HEK293T cells (B) incubated with G<sub>3</sub>SG-sgc8. The cell density was  $1 \times 10^5$  cells/mL, and the concentration of G<sub>3</sub>SG-sgc8 was 10 nM. As could be seen, the G<sub>3</sub>SG-Sgc8 specifically bound to the surfaces of HeLa cells.

## References

- 1 Y. Yang, X. Fan, Y. Long, K. Su, D. Zou, N. Li, J. Zhou, K. Li and F. Liu, *J. Mater. Chem.*, 2009, **19**, 7290–7295.
- 2 X. Tan, Y. Wang, B. A. Armitage and M. P. Bruchez, *Anal. Chem.*, 2014, **86**, 10864–10869.
- 3 K. A. Edwards and A. J. Baeumner, *Anal. Chem.*, 2014, **86**, 6610–6616.
- 4 L. Zhang, J. Zhu, S. Guo, T. Li, J. Li and E. Wang, *J. Am. Chem. Soc.*, 2013, **135**, 2403–2406.
- 5 X. Liu, F. Wang, R. Aizen, Q. Yehezkeli and I. Willner, *J. Am. Chem. Soc.*, 2013, **135**, 11832–11839.
- 6 X. He and N. Ma, *Anal. Chem.*, 2014, **86**, 3676–3681.
- 7 X. H. Chen, A. Roloff and Q. Seitz, *Angew. Chem. Int. Ed.*, 2012, **51**, 4479–4483.
- 8 Z. Zhou, T. Li, H. Huang, Y. Chen, F. Liu, C. Huang and N. Li, *Chem. Commun.*, 2014, **50**, 13373–13376.
- 9 C. Zhu, Z. Zeng, H. Li, F. Li, C. Fan and H. Zhang, *J. Am. Chem. Soc.*, 2013, **135**, 5998–6001.
- 10 C. H. Liu, J. Li, J. J. Liu, H. H. Yang, X. Chen and G. N. Chen, *Chem. Eur. J.*, 2010, **16**, 4889–4894.
- 11 F. Wang, J. Elbaz, C. Teller and I. Willner, *Angew. Chem. Int. Ed.*, 2011, **50**, 295–299.
- 12 R. Hu, T. Liu, X. B. Zhang, S. Y. Huan, C. Wu, T. Fu and W. Tan, *Anal. Chem.*, 2014, **86**, 5009–5016.
- 13 X. Zuo, F. Xia, Y. Xiao and K. W. Plaxco, *J. Am. Chem. Soc.*, 2010, **132**, 1816–1818.
- 14 C. H. Lu, F. Wang and I. Willner, *J. Am. Chem. Soc.*, 2012, **134**, 10651–10658.
- 15 X. Xiao, C. Zhang, X. Su, C. Song and M. Zhao, *Chem. Sci.*, 2012, **3**, 2257–2261.
- 16 J. Nie, M. Z. Zhao, W. J. Xie, L. Y. Cai, Y. L. Zhou and X. X. Zhang, *Chem. Sci.*, 2015, **6**, 1225–1229.
- 17 S. Q. Jin, B. C. Ye, H. Huo, A. J. Zeng, C. K. Xie, B. Q. Ren and H. J. Huang, *Anal. Chem.*, 2010, **82**, 9925–9931.
- 18 K. Feng, J. Li, J. H. Jiang, G. L. Shen and R. Q. Yu, *Biosens. Bioelectron.*, 2007, **22**, 1651–1657.
- 19 J. Li, J. H. Jiang, X. M. Xu, X. Chu, C. Jiang, G. Shen and R. Q. Yu, *Analyst*, 2008,

- 133, 939–945.
- 20 J. Li, T. Deng, X. Chu, R. Yang, J. Jiang, G. Shen and R. Yu, *Anal. Chem.*, 2010, **82**, 2811–2616.
- 21 K. Feng, J. Zhao, Z. S. Wu, J. Jiang, G. Shen and R. Yu, *Biosens. Bioelectron.*, 2011, **26**, 3187–3191.
- 22 B. Li, H. Wei and S. Dong, *Chem. Commun.*, 2007, 73–75.
- 23 H. Wei, B. Li, J. Li, E. Wang and S. Dong, *Chem. Commun.*, 2007, 3735–3737.
- 24 Z. Zhang, S. Liu, Y. Shi, Y. Zhang, D. Peacock, F. Yan, P. Wang, L. He, X. Feng and S. Fang, *J. Mater. Chem. B*, 2014, **2**, 1530–1538.
- 25 W. Li, Y. Dong, X. Wang, H. Li, D. Xu, *Biosens. Bioelectron.*, 2015, **66**, 43–49.
- 26 T. Bao, W. Wen, X. Zhang and S. Wang, *Anal. Chim. Acta*, 2015, **860**, 70–76.
- 27 P. He, L. Liu, W. Qiao and S. Zhang, *Chem. Commun.*, 2014, **50**, 1481–1484.
- 28 J. Tang, B. Kong, Y. Wang, M. Xu, Y. Wang, H. Wu and G. Zheng, *Nano Lett.*, 2013, **13**, 5350–5354.
- 29 J. Wang, L. Wu, J. Ren and X. Qu, *Small*, 2012, **2**, 259–264.
- 30 J. J. Zhang, F. F. Cheng, T. T. Zheng and J. J. Zhu, *Anal. Chem.*, 2010, **82**, 3547–3555
- 31 Li. Wu, J. Wang, J. Ren, W. Li and X. Qu, *Chem. Commun.*, 2013, **49**, 5675–5677.
